# Supplementary material
Source: PubMed Central journal article supplement (PMC11065614)
Supplement: NIHMS1968529-supplement-1.pdf [file NIHMS1968529-supplement-1.pdf]

## Supplemental Figure S1

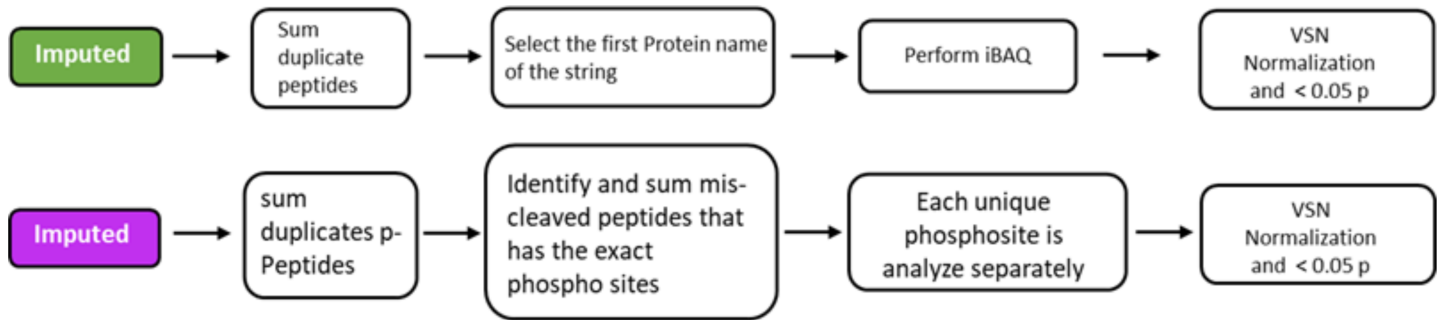

Sample processing workflow after raw files were searched using MaxQuant spectra matching to a peptide sequence, for the proteome (green) and for the phosphoproteome (magenta).
