# Supplementary material
Source: PubMed Central journal article supplement (PMC11065614)
Supplement: NIHMS1968529-supplement-3.pdf [file NIHMS1968529-supplement-3.pdf]

### Supplemental Figure S3

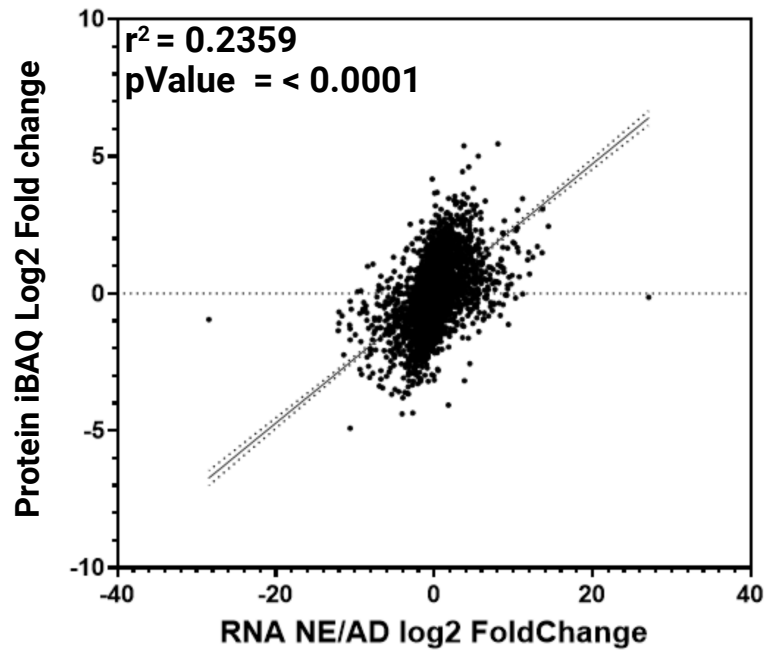

Overall linear regression plot between protein Log2 fold change relative intensity based average quantification (iBAQ) against the correspondent transcript FPKM Log2 fold change with a correlation of  $r^2=0.2359$  and a p-value of  $< 0.0001$
